# Supplementary material for: Extracellular vesicles from endothelial progenitor cells prevent steroid-induced osteoporosis by suppressing the ferroptotic pathway in mouse osteoblasts based on bioinformatics evidence
Source: PubMed Central journal article supplement (PMC6834614; doi:10.1038/s41598-019-52513-x), 2019-11-06
Supplement: 41598_2019_52513_MOESM1_ESM.pdf [file 41598_2019_52513_MOESM1_ESM.pdf]

## Supplementary Information

### Extracellular vesicles of endothelial progenitor cells prevent steroid-induced osteoporosis via suppression of ferroptotic pathway in mice osteoblast based on bioinformatic evidence.

Jinsen Lu<sup>1,\*</sup>, Jiazhao Yang<sup>1</sup>, Yongshun Zheng<sup>1</sup>, Xiaoyu Chen<sup>2</sup>, Shiyuan Fang<sup>1,\*</sup>

<sup>1</sup>Department of Orthopaedics, Anhui Provincial Hospital, Anhui Medical University, Lujiang Road No.17, 230001 Hefei, China.

<sup>2</sup>Department of histology and embryology, Anhui Medical University, Meishan Road No. 81, 230032 Hefei, China.

\*Corresponding at: Prof. Shiyuan Fang, E-mail: fangshiyuan@126.com;

Dr Jinsen Lu, E-mail: lujinsen@stu.ahmu.edu.cn

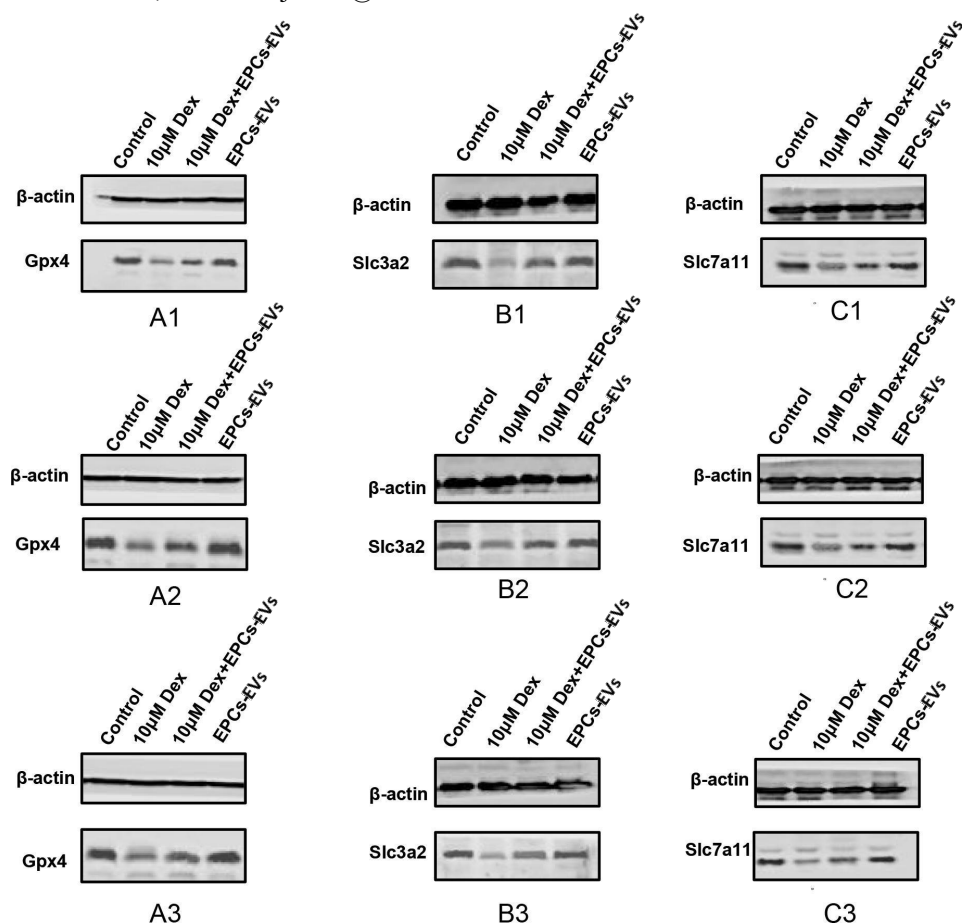

**Figure S1. Detection of three major ferroptotic participants.** Mice osteoblast was pre-treated with 10μM dexamethasone, an equal volume of PBS, 100μg EPCs-EVs and combination of 10μM dexamethasone and 100μg EPCs-EVs for 72 hours. Cells were lysed and receiving western blot analysis. Represent images and graphs show the expressive level of ferroptotic participants including (A1-3) GPX4, (B1-3) SLC3A2 and (C1-3) SLC7A11 between control, 10uM Dexmethone group, 10μM dexamethasone+100μg EPCs-EVs and 100μg EPCs-EVs group in three repeated experiments.

## 10 $\mu$ M Dex vs 10 $\mu$ M Dex+100 $\mu$ g EPCs-EVs

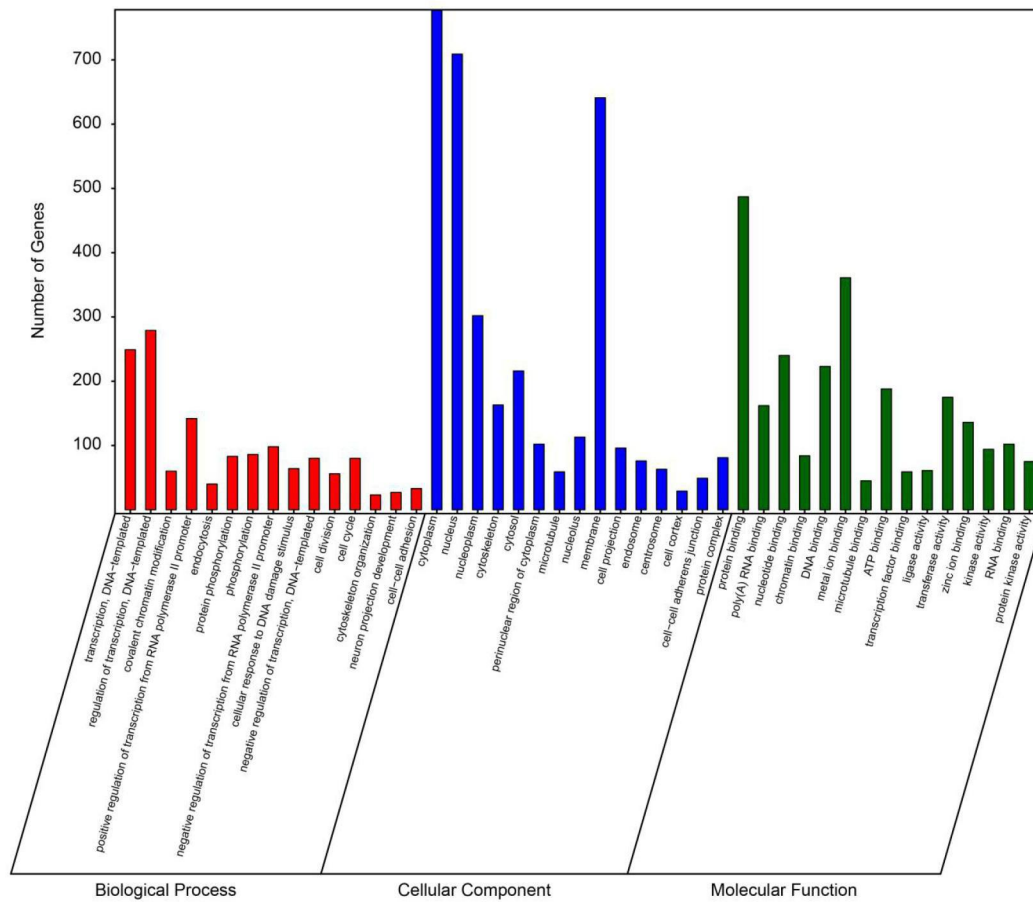

**Figure S2. GO enrichment analysis of differentially expressed gene.**

Osteoblast was pretreated with 10 $\mu$ M dexamethone and combination of 10 $\mu$ M dexamethone and 100 $\mu$ g EPCs-EVs for 72 hours. Total RNA was extracted and detected via RNA-sequencing. The number of the differentially expressed gene was mapped into specific pathways in GO database in terms of 3 aspects including molecular function, cellular component, and biological process. Y-axis was determined via the number of genes in certain pathway. Top 10 pathway were listed in X-axis.

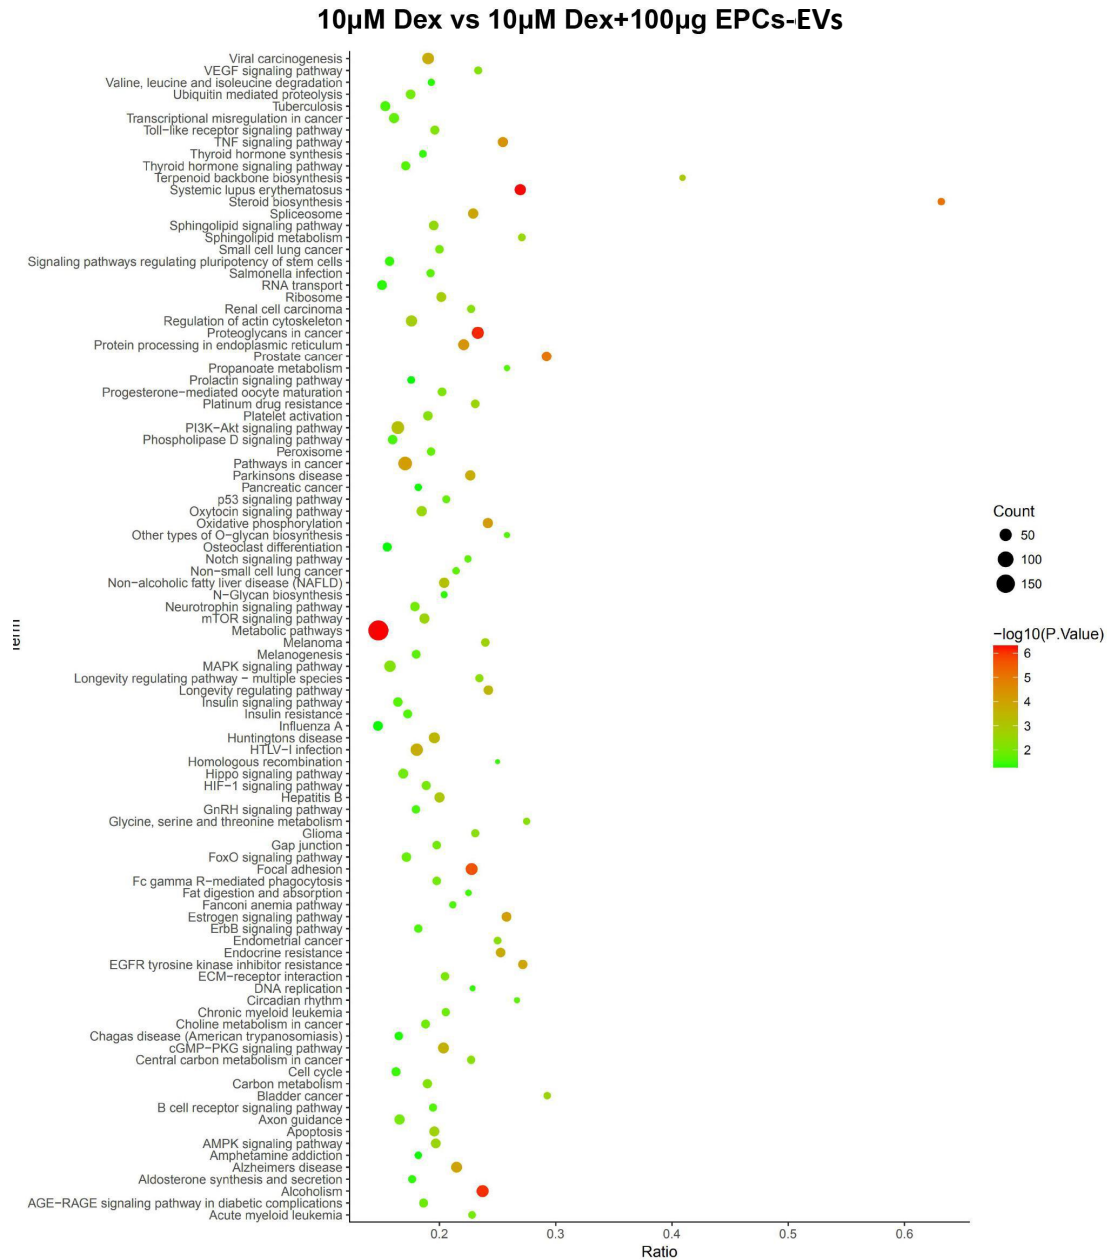

**Figure S3. KEGG enrichment analysis of differentially expressed gene.** Osteoblast was pretreated with dexamethasone and a combination of dexamethasone and EPCs-EVs for 72 hours. Total RNA was extracted and detected via RNA-sequencing. The number of the differential expressed gene was mapped into specific pathways in KEGG database. Y-axis shows the top 55 pathway involved in KEGG database. The number of genes mapped to a certain pathway was expressed as the size of dot. The intensity of difference was expressed as the color from green to red (PValue).

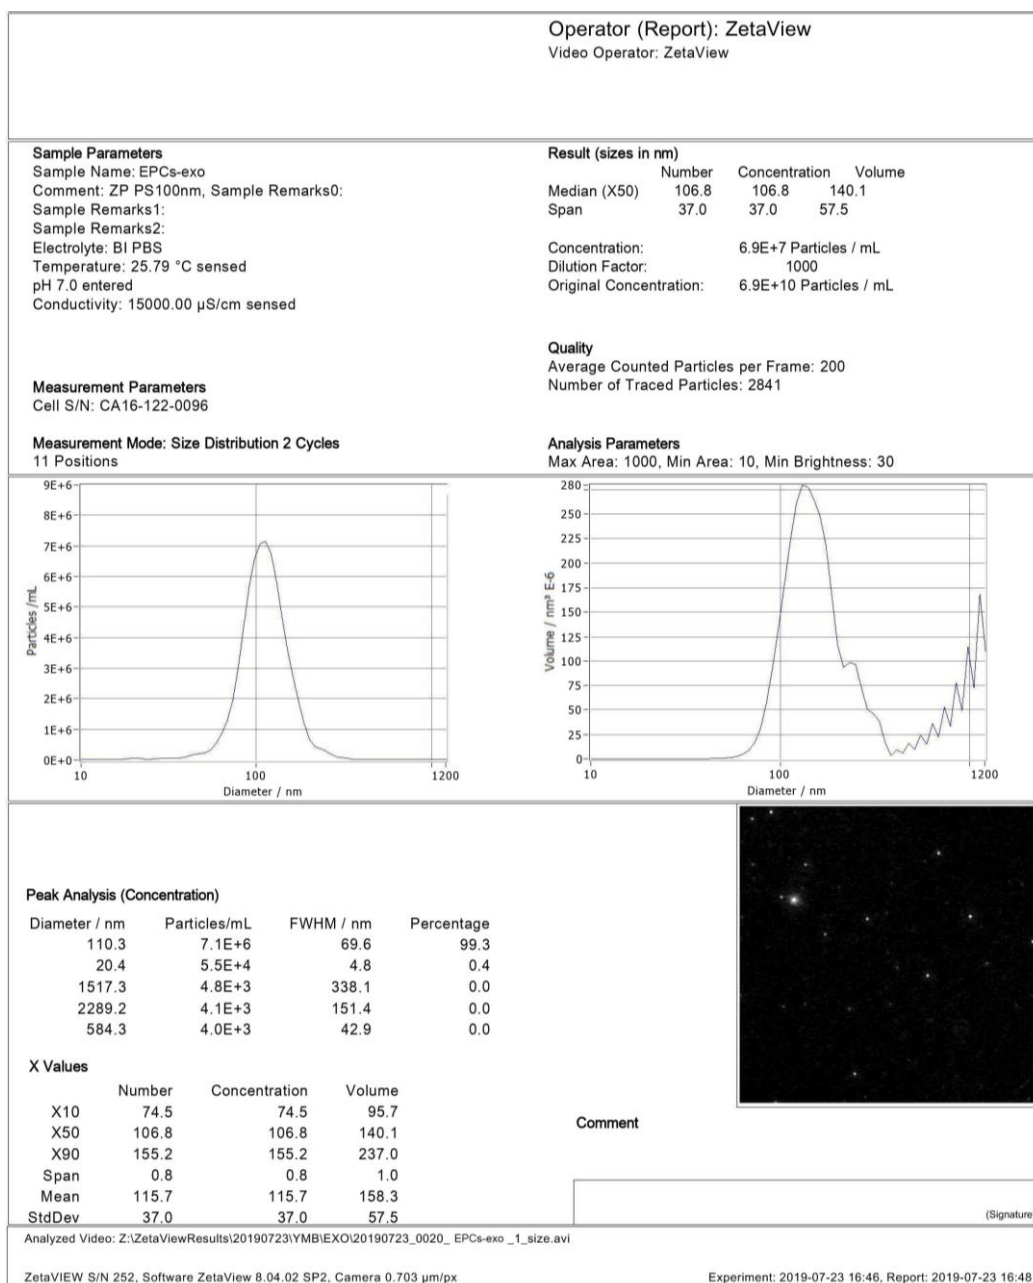

**Figure S4. NTA overall report**

Attached file 1:20190723\_0020\_EPCs-exo\_1\_size, raw data for the report.

Attached file 2:20190723\_0020\_EPCs-exo-2\_1\_size\_11pos, raw data for the report.

Attached file 3:Video of individual particles, recorded video for the particle detection.
